# Supplementary material for: A precious-metal-free Fe-intercalated carbon nitride porous-network with enhanced activity for the oxygen reduction reaction and methanol-tolerant oxygen reduction reaction
Source: Royal Society of Chemistry journal article supplement (doi:10.1039/d0se00671h), 2020-01-01
Supplement: d0se00671h1.pdf [file d0se00671h1.pdf]

Electronic Supplementary Information (ESI)

Precious-Metal-Free Fe-Intercalated Carbon Nitride Porous-Network with  
Enhanced Activity for Oxygen Reduction Reactions and Methanol-Tolerant  
Oxygen Reduction Reactions

Ammar Bin Yousaf <sup>a\*</sup>, John R. Monnier,<sup>b</sup> John W. Weidner,<sup>b</sup> Mohammad K.

Hassan <sup>a</sup>, Syed Javaid Zaidi <sup>a</sup> and Peter Kasak <sup>a\*</sup>

<sup>a</sup>Center for Advanced Materials, Qatar University, Doha 2713, Qatar

<sup>b</sup>Department of Chemical Engineering, University of South Carolina, Columbia, 29208, United States

\* Corresponding Authors E-mails: [ammar@mail.usc.edu.cn](mailto:ammar@mail.usc.edu.cn), [ammar.chemist18@gmail.com](mailto:ammar.chemist18@gmail.com) (A.B. Yousaf) and  
[peter.kasak@qu.edu.qa](mailto:peter.kasak@qu.edu.qa) (P. Kasak)

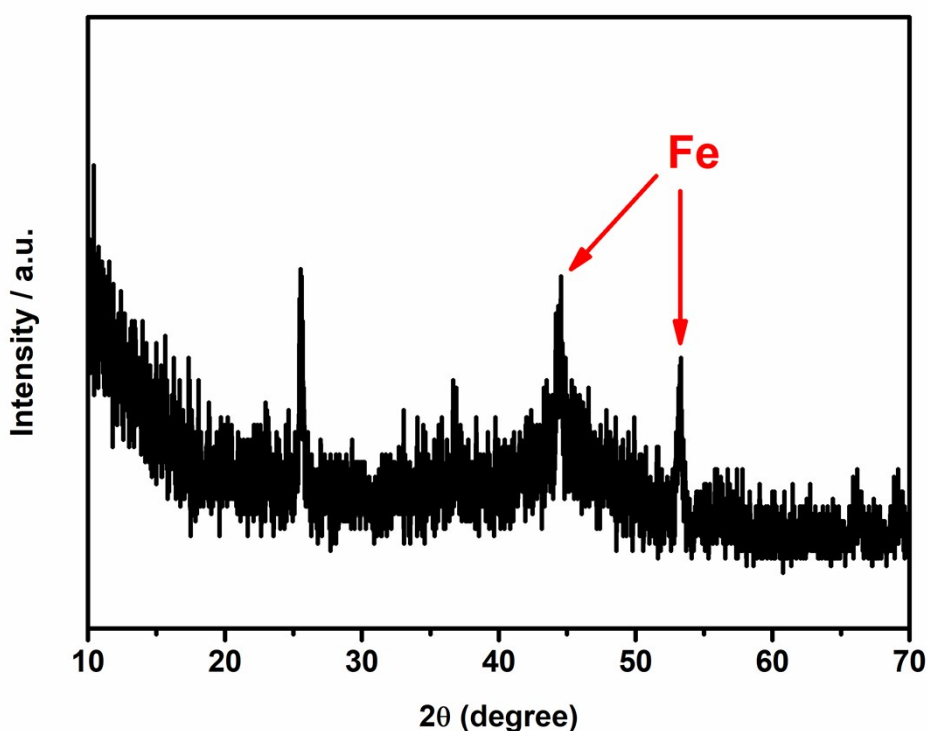

**Fig. S1:** XRD analysis of Fe-N-C 800 °C catalyst before acid leaching.

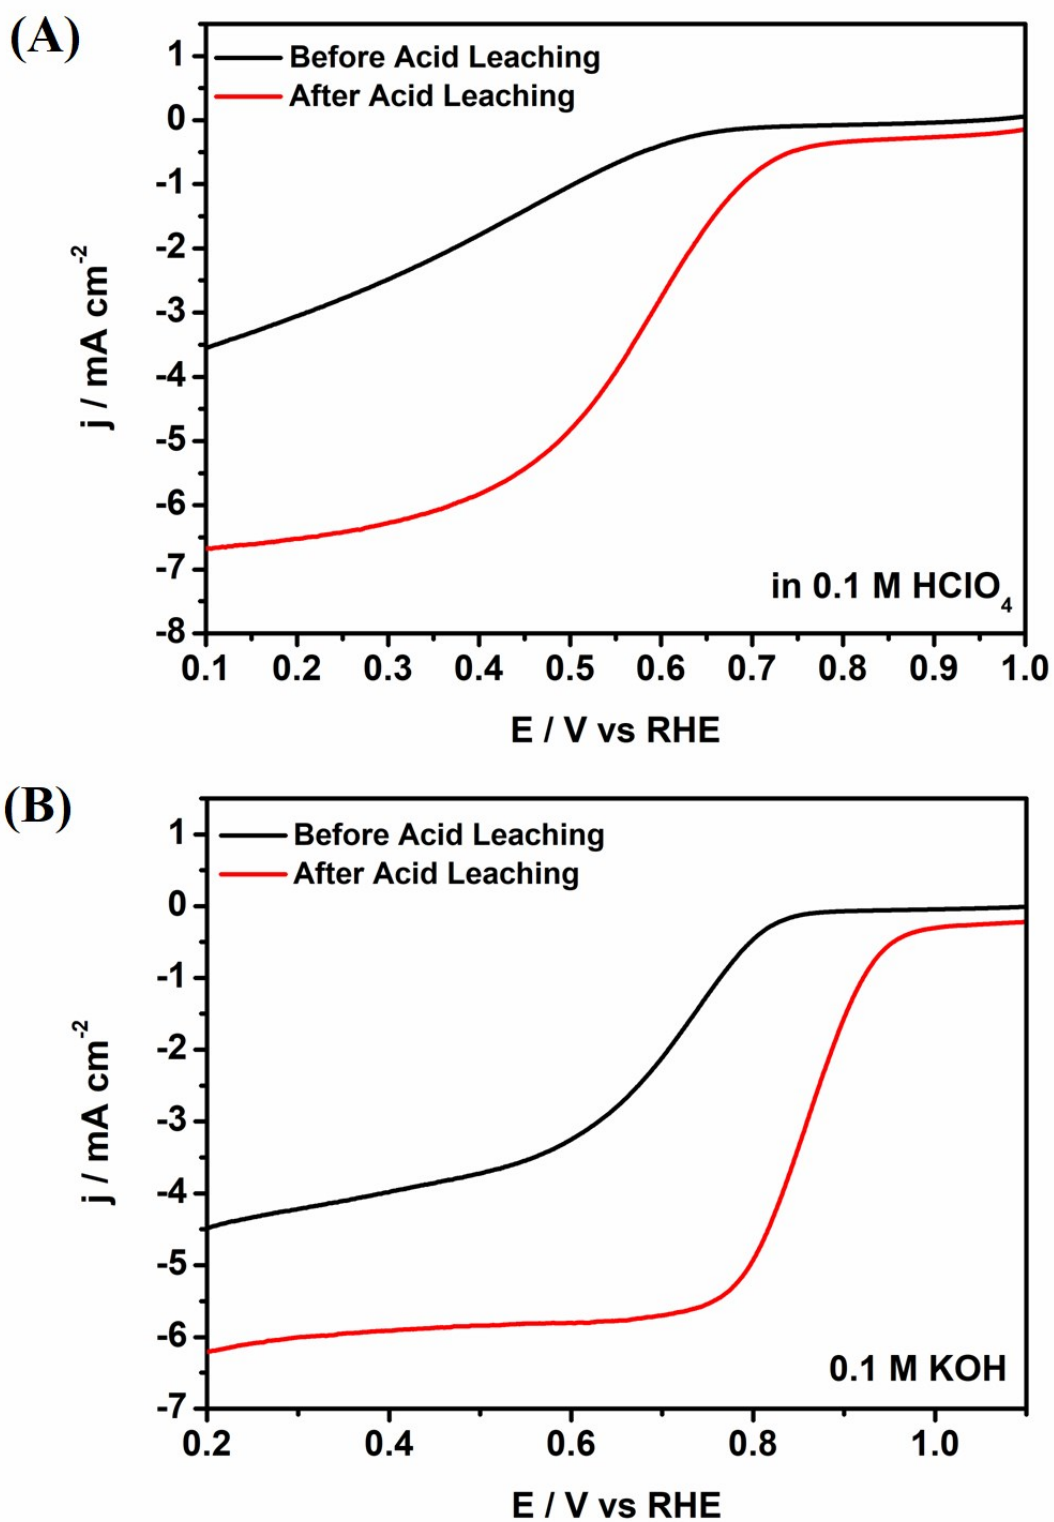

**Fig. S2:** Comparison of ORR performance of Fe-N-C 800 °C catalyst, (A) in acidic medium & (B) in alkaline medium.

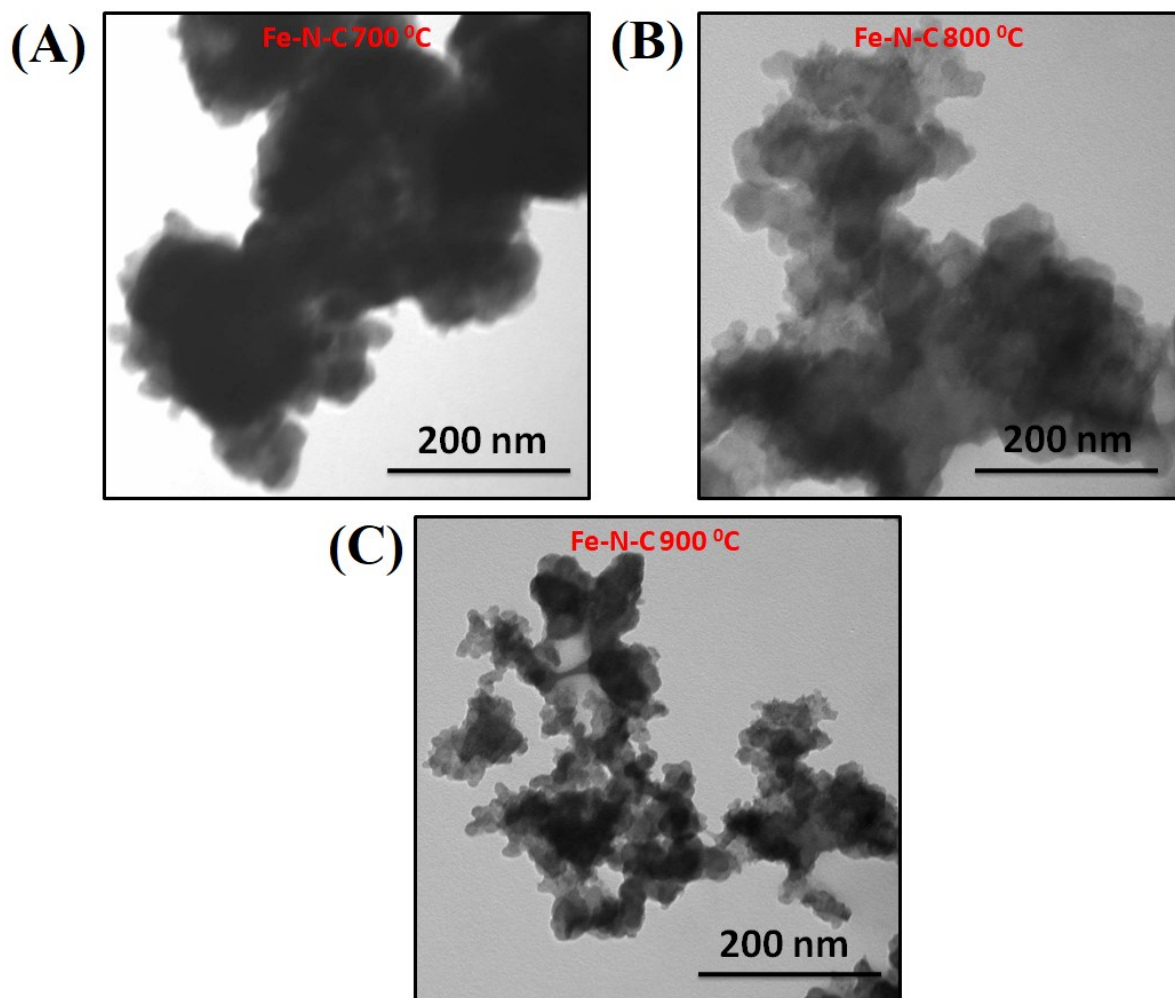

**Fig. S3:** Comparison of TEM analysis for Fe-N-C catalysts synthesized at three different temperatures (A) at 700 °C (B) at 800 °C and (C) at 900 °C.

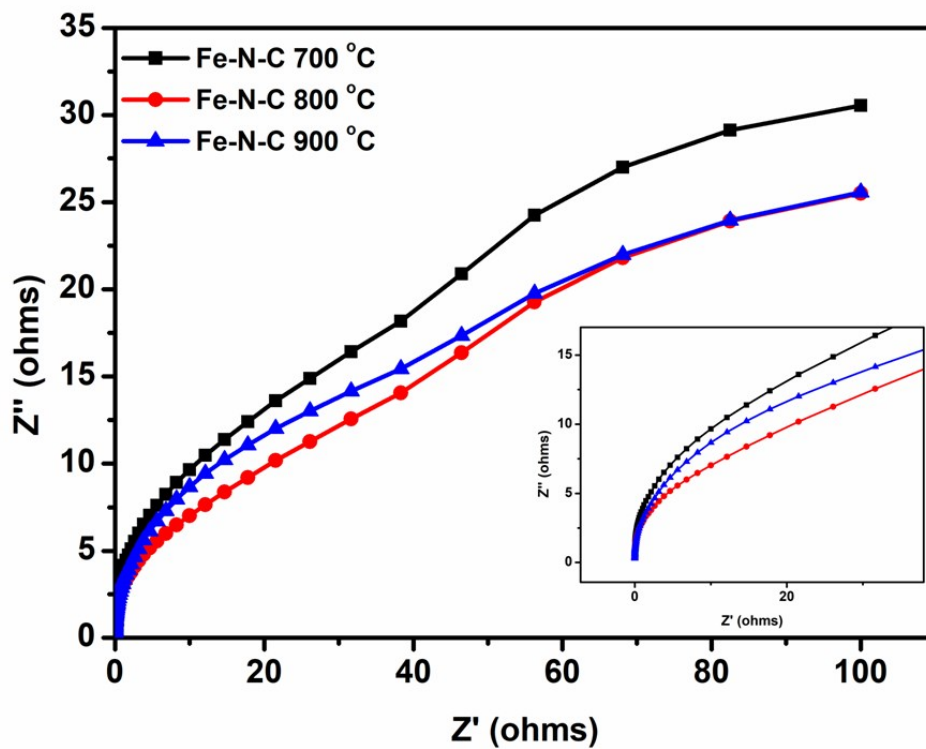

**Fig. S4:** Comparison of EIS performance of Fe-N-C 700 °C, Fe-N-C 800 °C and Fe-N-C 900 °C catalysts.

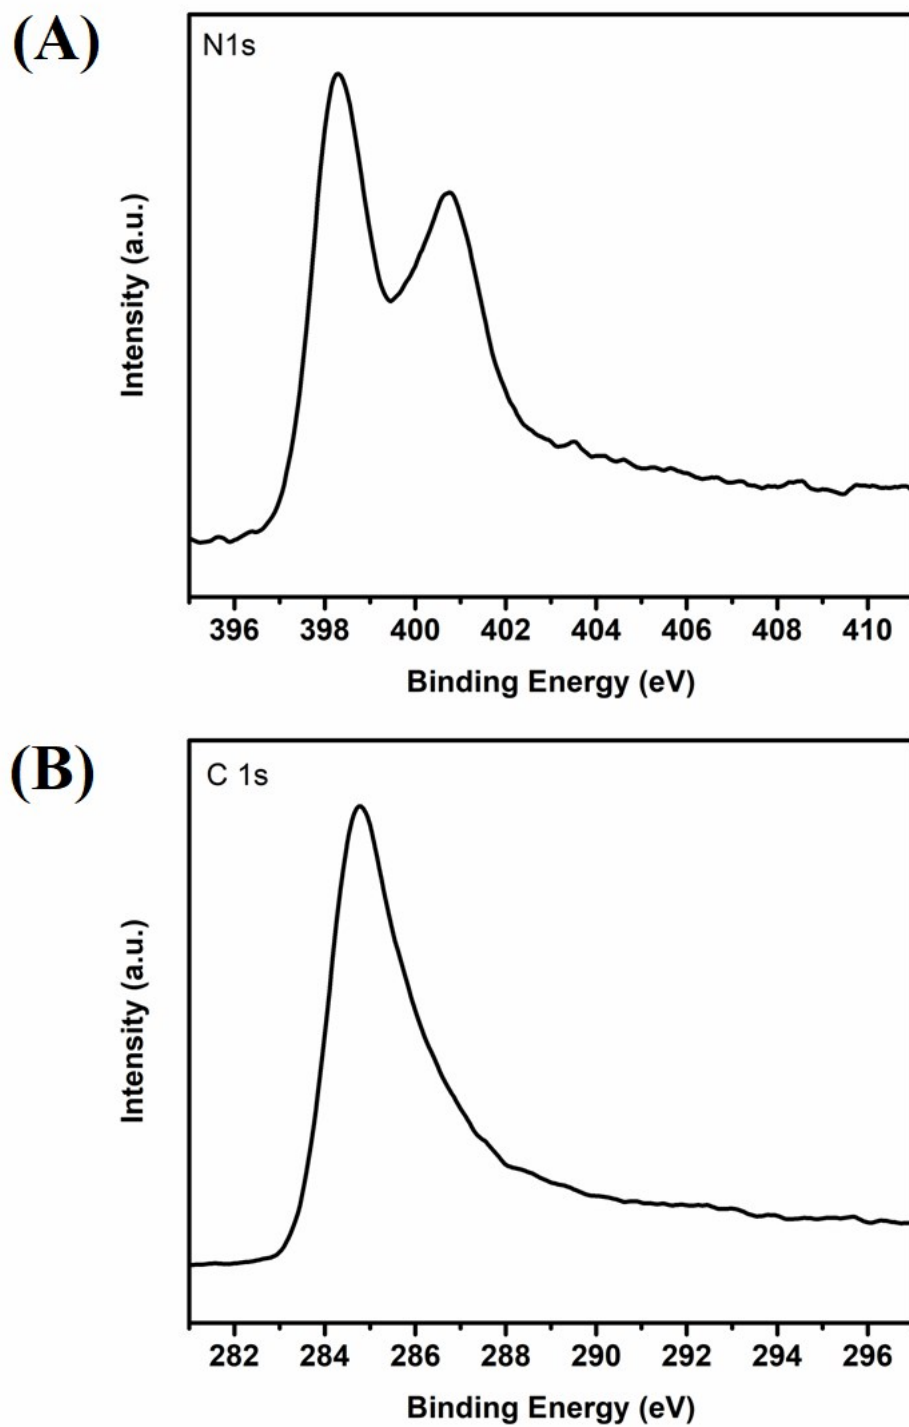

**Figure S5:** XPS analysis of MCA template after its calcinations to develop C-N material for comparison, (A) presenting high resolution N1s scan and (B) high resolution C1s scan.
